# Supplementary material for: Ultra-low diffusion barrier tetramethyl ammonium cation-intercalated layered MnO2 for high-performance aqueous zinc-ion batteries
Source: Royal Society of Chemistry journal article supplement (doi:10.1039/d4ta00609g), 2024-01-01
Supplement: d4ta00609g1.pdf [file d4ta00609g1.pdf]

# **Ultra-low diffusion barrier tetramethyl ammonium cation-intercalated layered MnO<sub>2</sub> for high-performance aqueous zinc-ion batteries**

Zixiang Zhou, Jianbo Tong\*, Xiaoliang Zou, Yue Wang, Yuxuan Bai, Yifan Yang,  
Youyong Li, Chao Wang\*, Shuling Liu\*

*Department of Chemistry and Chemical Engineering, Shaanxi Collaborative Innovation Center of Industrial Auxiliary Chemistry & Technology, Key Laboratory of Auxiliary Chemistry and Technology for Chemical Industry, Ministry of Education, Shaanxi University of Science and Technology, Xi'an, Shaanxi 710021, China*

\*Corresponding author.

E-mail address: liushuling@sust.edu.cn

jianbotong@aliyun.com

cwang@sust.edu.cn

## Experimental

### *Chemicals*

The following reagents were used without further purifications. manganese chloride tetrahydrate ( $\text{MnCl}_2 \cdot 4\text{H}_2\text{O}$ , AR, 99.0%), tetramethylammonium hydroxide pentahydrate ( $\text{C}_4\text{H}_{13}\text{NO} \cdot 5\text{H}_2\text{O}$ , AR, 97.0%), hydrogen peroxide ( $\text{H}_2\text{O}_2$ , AR, 30%), manganese sulfate tetrahydrate ( $\text{MnSO}_4 \cdot 4\text{H}_2\text{O}$ , AR, 98.0%), zinc sulfate heptahydrate ( $\text{ZnSO}_4 \cdot 7\text{H}_2\text{O}$ , AR, 98.0%), potassium chloride (KCl, AR, 99%), sodium chloride (NaCl, AR, 98%), magnesium chloride ( $\text{MgCl}_2$ , AR, 98%), calcium chloride ( $\text{CaCl}_2$ , AR, 98%), cobalt chloride hexahydrate ( $\text{CoCl}_2 \cdot 6\text{H}_2\text{O}$ , AR, 98%), nickel chloride hexahydrate ( $\text{NiCl}_2 \cdot 6\text{H}_2\text{O}$ , AR, 98%), and doubly distilled water.

### *Preparation of X-MnO<sub>2</sub> (X=Na, Mg, K, Ca, Co, Ni, Zn)*

The preparation of X-MnO<sub>2</sub> (X = Na, Mg, K, Ca, Co, Ni, Zn) was similar to that of TMA-MnO<sub>2</sub>. After washing, the MnO<sub>2</sub> were added to 1 M solutions of KCl, NaCl, MgCl<sub>2</sub>, CaCl<sub>2</sub>, CoCl<sub>2</sub>, NiCl<sub>2</sub>, or ZnSO<sub>4</sub>. After allowing the mixture to stand at room temperature for 3 days, the suspension underwent centrifugation to gather precipitates, which were subsequently washed at least six times with deionized water. The final samples, labeled as Na-MnO<sub>2</sub>, K-MnO<sub>2</sub>, Ca-MnO<sub>2</sub>, Mg-MnO<sub>2</sub>, Co-MnO<sub>2</sub>, Ni-MnO<sub>2</sub> and Zn-MnO<sub>2</sub>, were obtained by freeze-drying the precipitates.

### *Material characterizations*

Crystallographic phases of the samples were assessed using X-ray diffraction (XRD) employing a Bruker D8 Advance instrument in Bragg-Brentano geometry with a Cu target ( $\lambda = 0.154$  nm). Thermogravimetric analysis (TGA) was conducted to analyze

the degradation pattern of precursor samples (post-drying) from room temperature to 600 °C at a heating rate of 5 °C min<sup>-1</sup> under N<sub>2</sub> flow, utilizing a thermogravimetric analyzer (STA7200RV, Hitachi). X-ray photoelectron spectroscopy (XPS) measurements were performed using an AXIS SUPRA instrument (Renishaw-invia). Fourier transform infrared (FTIR) spectroscopy was executed using an INVENIO instrument (Bruker) to determine infrared spectra. Field emission scanning electron microscopy (FE-SEM) at an accelerating voltage of 10 kV equipped with energy-dispersive X-ray spectroscopy (EDS) (Xplore-30, Oxford) was employed to observe sample morphologies. Raman spectroscopy measurements were conducted using a Renishaw Invia Raman spectroscope. Transmission electron microscopy (TEM), High-resolution transmission electron microscopy (HR-TEM), and selected area electron diffraction (SAED) patterns were obtained utilizing the FEI Tecnai G2 F20 instrument with an acceleration voltage of 200 kV.

#### *Electrochemical characterizations*

The cathode of the ZIBs was fabricated using active material, acetylene black as the conductive agent, and polyvinylidene fluoride as the binder (with a weight ratio of 7:2:1), and N-methyl-2-pyrrolidone was utilized as the solvent during the process of ink slurry preparation. After continuous stirring, the resulting slurry was coated onto a stainless steel circular mesh with a diameter of 12 mm, followed by drying in a vacuum oven at 80 °C for 12 h. The active material loading was approximately 2 mg cm<sup>-2</sup>. The electrochemical analysis of all samples was performed using a CR2032 coin cell with zinc foil as the negative electrode, glass fiber as the separator, and 2 M ZnSO<sub>4</sub> + 0.2 M

MnSO<sub>4</sub> aqueous solution as the electrolyte. Cyclic voltammetry (CV) and electrochemical impedance spectroscopy (EIS) were conducted using CHI660E or PARSTAT MC potentiostats. Unless specified otherwise, all potentials are referenced to Zn/Zn<sup>2+</sup>. The CV scans were performed within the range of 1-1.85 V at a scan rate of 0.1 mV s<sup>-1</sup>, while EIS measurements were carried out across a frequency spectrum from 10<sup>5</sup> to 0.01 Hz, with an alternating potential amplitude of 5 mV. A battery test system (LAND MTI-5 V 10 mA) was utilized to assess the cycling and charge–discharge characteristics of the coin cells. The galvanostatic intermittent titration technique (GITT) involved a series of galvanostatic discharge pulses (10 minutes at 100 mA g<sup>-1</sup> followed by a 30-minute rest) within the potential range of 1-1.85 V. In situ electrochemical quartz crystal microbalance (EQCM, QCM922, Princeton) measurements combined with cyclic voltammetry and charge-discharge curves were used to explore the charge storage mechanism. Electrochemical tests were performed in a two-electrode cell configuration with TMA-MnO<sub>2</sub> coated on Au as the working electrode (prepared in the same process as the cathode) and Zn as the counter/reference electrode. EQCM data were analyzed based on the Sauerbrey equation:

$$\Delta_{mass} = \frac{-\Delta_{freq} * A * \sqrt{uq * pq}}{2(Fq^2)}$$

Where  $\Delta_{mass}$  is the mass change,  $\Delta_{freq}$  is the resonance frequency change,  $A$  is the gold electrode surface (0.198 cm<sup>2</sup>),  $uq$  is the AT-cut quartz constant (2.947x10<sup>-11</sup> g cm<sup>-2</sup>),  $pq$  is the quartz crystal density (2.65 g cm<sup>-2</sup>),  $Fq$  is the reference frequency (9.00 MHz)

All the electrochemical tests were performed at room temperature.

*Density functional theory calculations*

Calculations are conducted within the density functional theory (DFT) framework, employing the projected enhanced wave method and implemented using the Vienna Ab initio Simulation Package (VASP). Generalized gradient approximation (GGA) with Perdew-Burke-Ernzerhof (PBE) exchange functions is employed. The plane wave basis cutoff energy is set to 520 eV, and stringent convergence criteria are applied, with energy and force calculations requiring convergence to within  $10^{-5}$  eV/atom and 0.05 eV/Å, respectively. For unit cell optimization of the MnO<sub>2</sub> and TMA-MnO<sub>2</sub> structures, a  $2 \times 1 \times 1$   $\Gamma$ -centered grid is utilized as the Brillouin zone sampling scheme. In contrast, density of states calculations employ a  $3 \times 2 \times 2$   $\Gamma$ -centered grid. The embedding structure of Zn undergoes optimization, with the original cell expanded and re-embedded using a  $2 \times 1 \times 1$  grid. The calculation of diffusion paths is carried out employing the Nudged-Elastic-Band (NEB) method. Additionally, for the optimization of the Zn embedding structure, a  $\Gamma$ -only Brillouin zone sampling scheme is employed.

### *Energy Density and Power Density*

The energy density and power density were obtained by the following equations:

$$E = \int_0^{\Delta t} \frac{V \times i}{m} dt$$

$$P = \frac{E}{1000 \times \Delta t}$$

where  $E$  (Wh kg<sup>-1</sup>) is the energy density,  $P$  is the power density (kW kg<sup>-1</sup>),  $V$  (V),  $i$  (mA),  $m$  (g) and  $\Delta t$  (h) represent the working potential, discharging current, the mass loading of the cathode and the discharging time, respectively.

### *Diffusion Coefficient*

The diffusion coefficient ( $D$ ) is obtained from the following equation,

$$D = \frac{4L^2}{\pi\tau} \left( \frac{\Delta E_s}{\Delta E t} \right)$$

where  $\tau$  (s) is the constant current pulse time. The  $L$  is diffusion length (cm) of Zn<sup>2+</sup> and H<sup>+</sup> which is equal to thickness of electrode. The  $\Delta E_s$  is the steady-state voltage change caused by the current pulse. The  $\Delta E t$  are voltage changes during the constant current pulse.

**Table S1.**

Chemical components of the X-MnO<sub>2</sub> (X=Na, Mg, K, Ca, Co, Ni, Zn) with ICP-AES analysis.

| <b>Samples</b>      | <b>X: Mn Ratio<br/>(X=Na<sup>+</sup>/Mg<sup>2+</sup>/K<sup>+</sup>/Ca<sup>2+</sup>/Co<sup>2+</sup>/Ni<sup>2+</sup>/Zn<sup>2+</sup>)</b> |
|---------------------|-----------------------------------------------------------------------------------------------------------------------------------------|
| Na-MnO <sub>2</sub> | 0.43                                                                                                                                    |
| Mg-MnO <sub>2</sub> | 0.16                                                                                                                                    |
| K-MnO <sub>2</sub>  | 0.23                                                                                                                                    |
| Ca-MnO <sub>2</sub> | 0.29                                                                                                                                    |
| Co-MnO <sub>2</sub> | 0.26                                                                                                                                    |
| Ni-MnO <sub>2</sub> | 0.22                                                                                                                                    |
| Zn-MnO <sub>2</sub> | 0.25                                                                                                                                    |

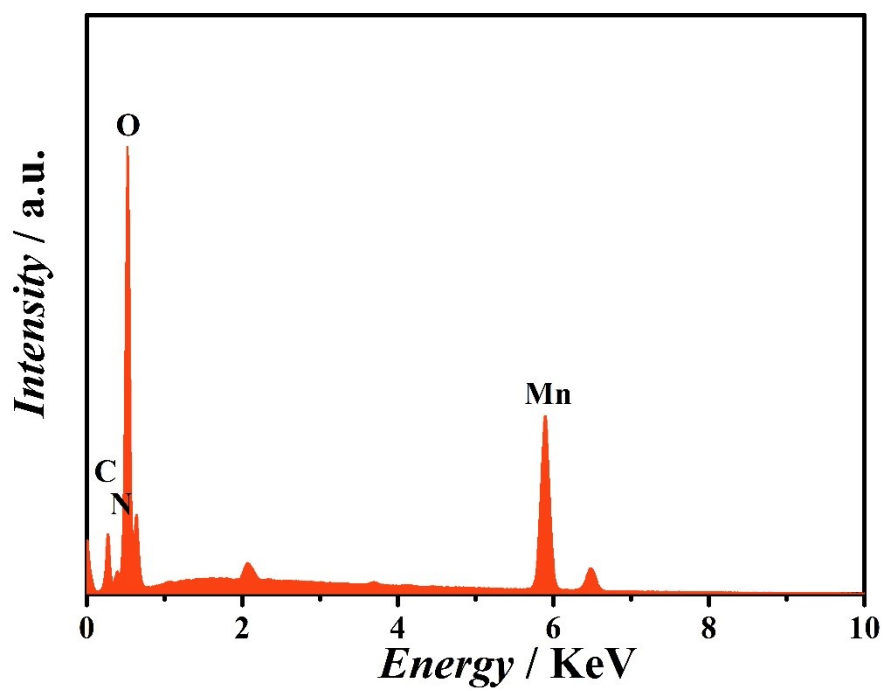

**Fig. S1.** EDS spectrum of TMA-MnO<sub>2</sub>. The N/Mn ratio was estimated to be 0.14.



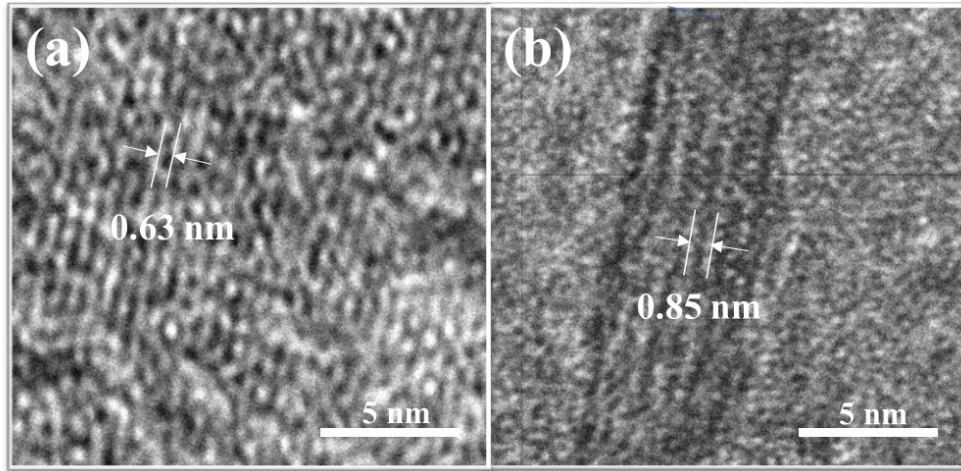

**Fig. S2.** HRTEM images of (a)  $\text{MnO}_2$  and (b) TMA- $\text{MnO}_2$ .

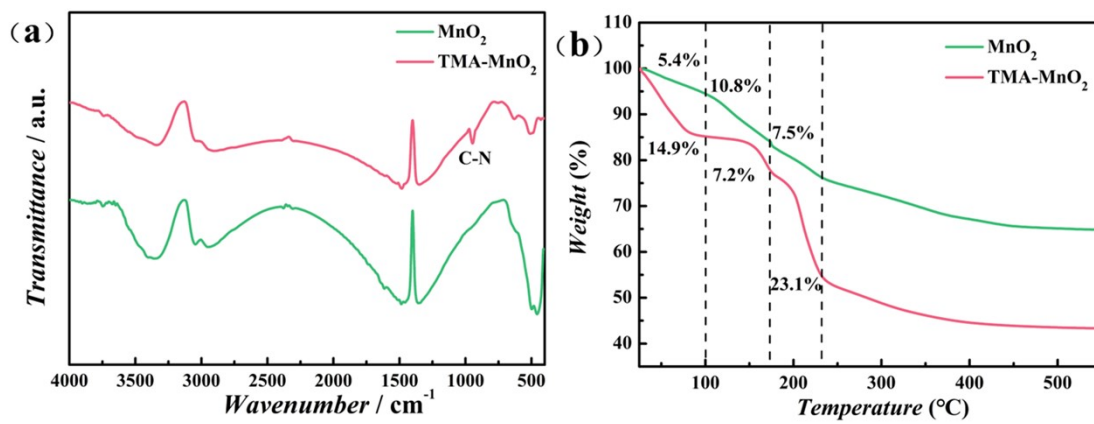

**Fig. S3.** (a) FTIR spectra and (b) TGA curves of the MnO<sub>2</sub> and TMA-MnO<sub>2</sub>.

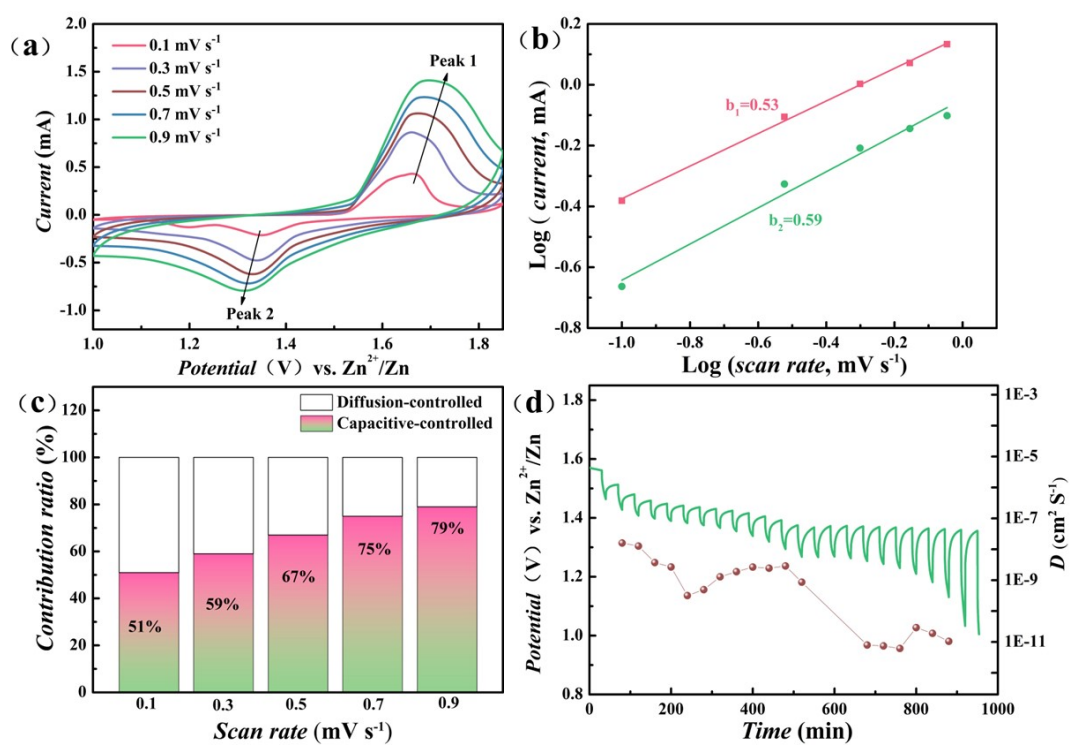

**Fig. S4.** (a) CV curve of the MnO<sub>2</sub> at 0.1 to 0.9 mV s<sup>-1</sup>; (b) The relationship between log (peak current) and log (scan rate) plot of the MnO<sub>2</sub>; (c) Capacitive-controlled process contribution to the capacity of the MnO<sub>2</sub>; (d) GITT curve and the corresponding diffusivity coefficients in discharge process of the MnO<sub>2</sub>.

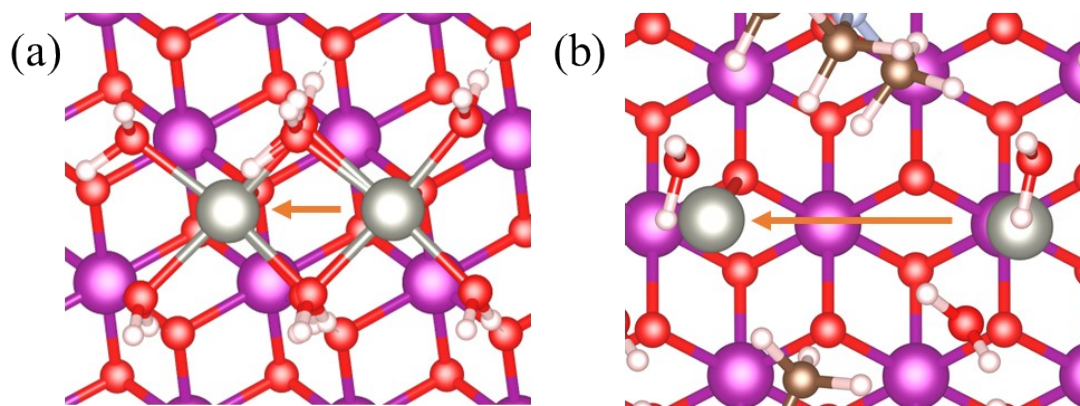

**Fig. S5.** Proposed diffusion path of the  $\text{MnO}_2$  and TMA- $\text{MnO}_2$ .

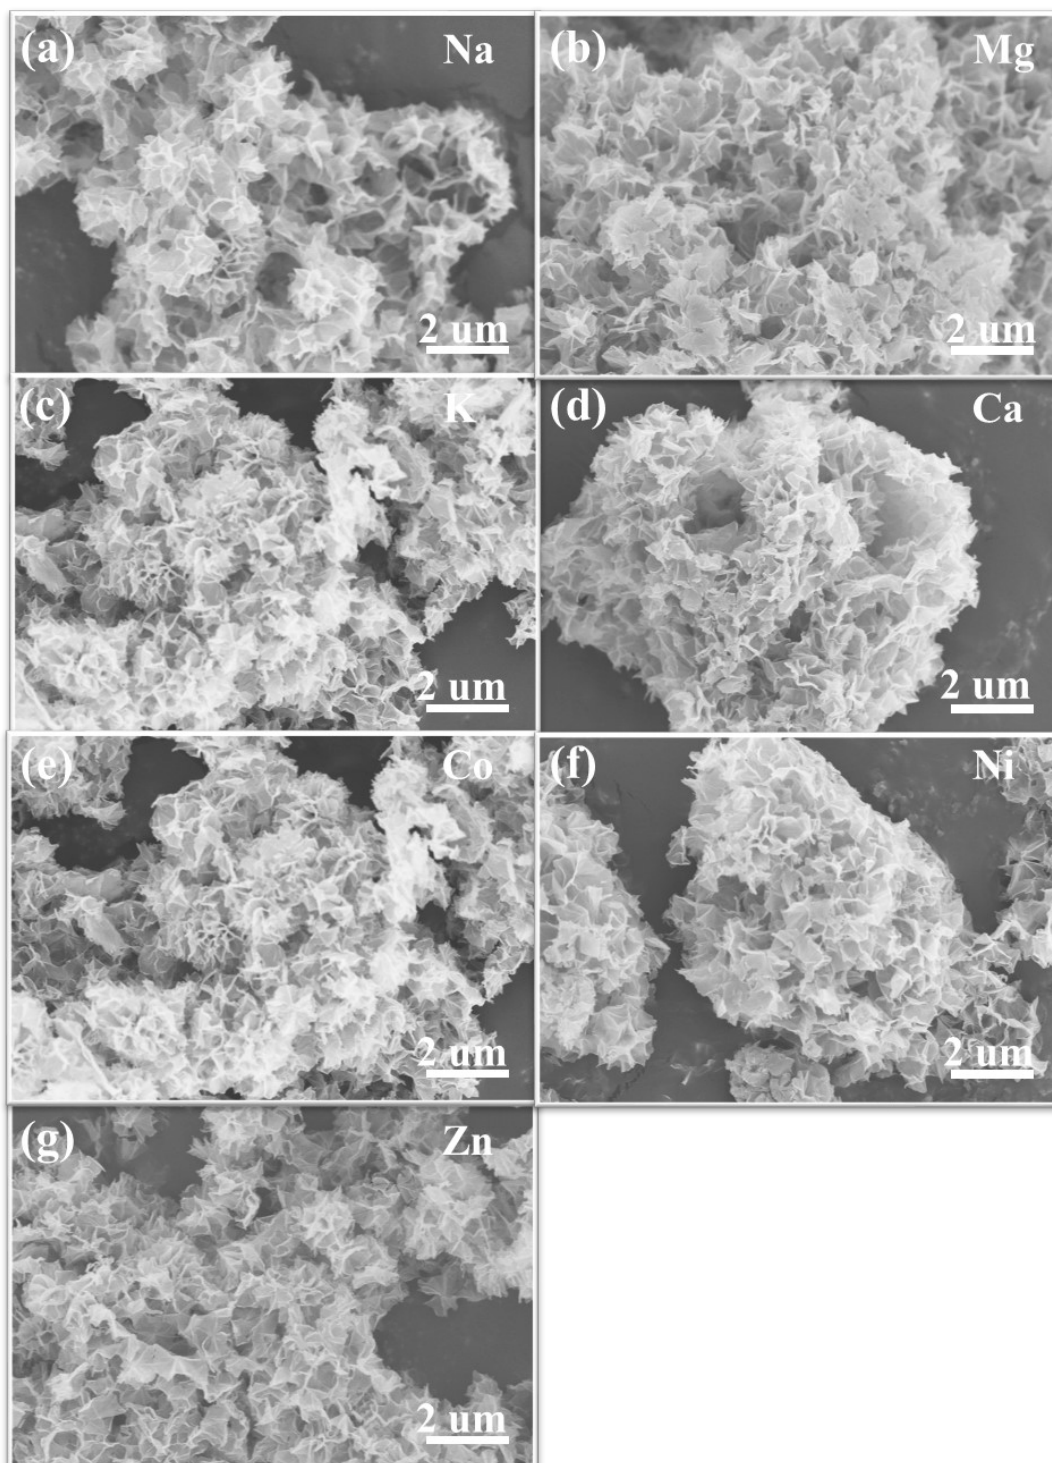

**Fig. S6.** SEM images of the X-MnO<sub>2</sub> (X=Na, Mg, K, Ca, Co, Ni, Zn).

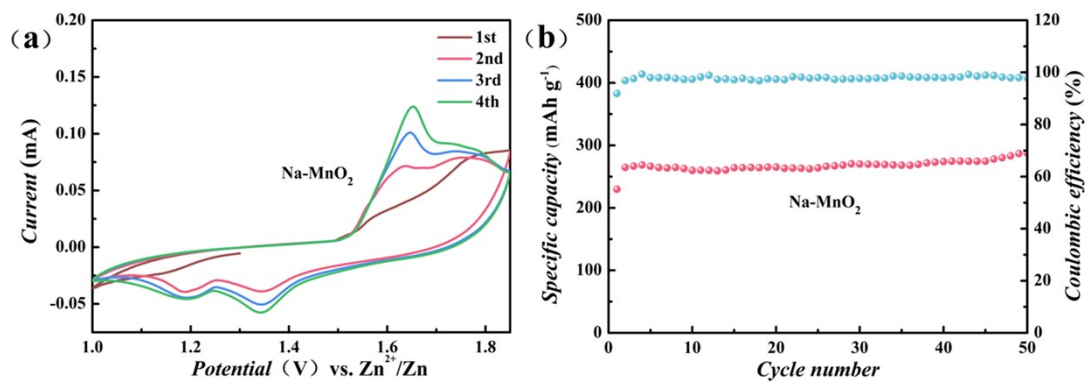

**Fig. S7.** CV of the Na-MnO<sub>2</sub> at the scan rate of 0.1 mV s<sup>-1</sup>; (b) Long-cycle performance of Na-MnO<sub>2</sub> at 0.2 A g<sup>-1</sup>.

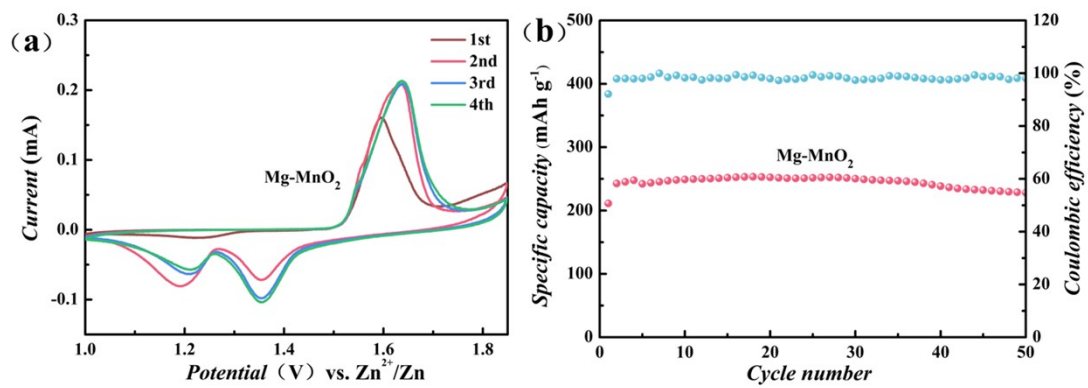

**Fig. S8.** CV of the Mg-MnO<sub>2</sub> at the scan rate of 0.1 mV s<sup>-1</sup>; (b) Long-cycle performance of Mg-MnO<sub>2</sub> at 0.2 A g<sup>-1</sup>.

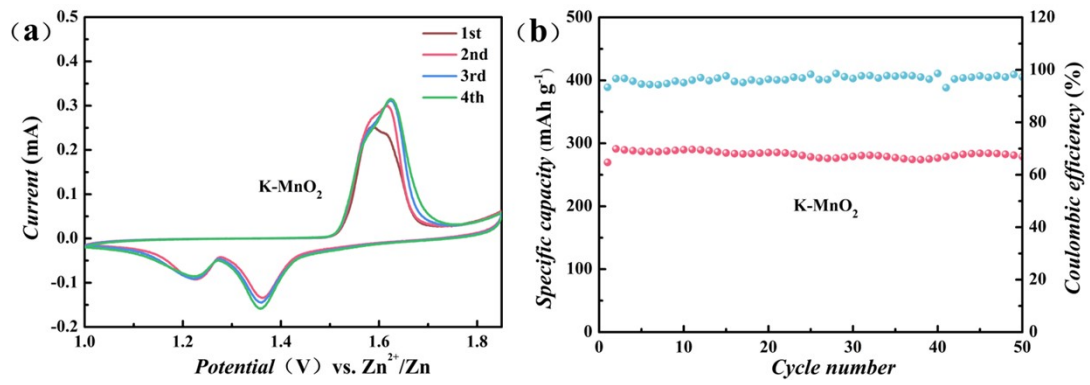

**Fig. S9.** CV of the K-MnO<sub>2</sub> at the scan rate of 0.1 mV s<sup>-1</sup>; (b) Long-cycle performance of K-MnO<sub>2</sub> at 0.2 A g<sup>-1</sup>.



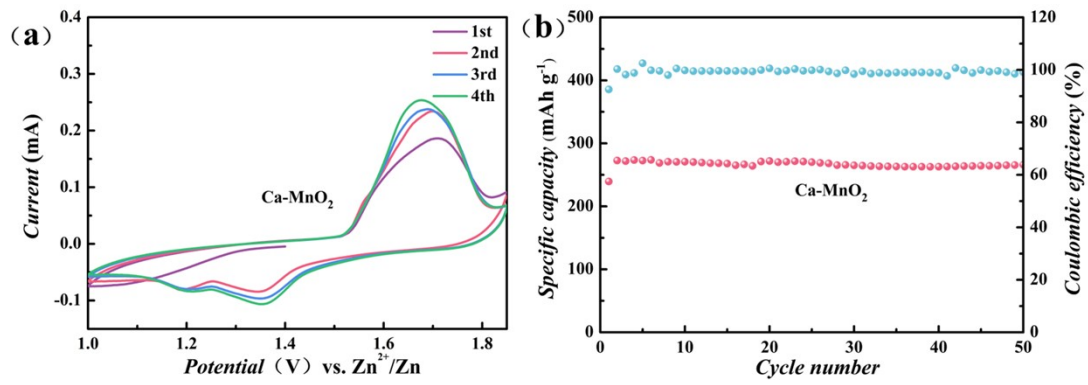

**Fig. S10.** CV of the Ca-MnO<sub>2</sub> at the scan rate of 0.1 mV s<sup>-1</sup>; (b) Long-cycle performance of Ca-MnO<sub>2</sub> at 0.2 A g<sup>-1</sup>.

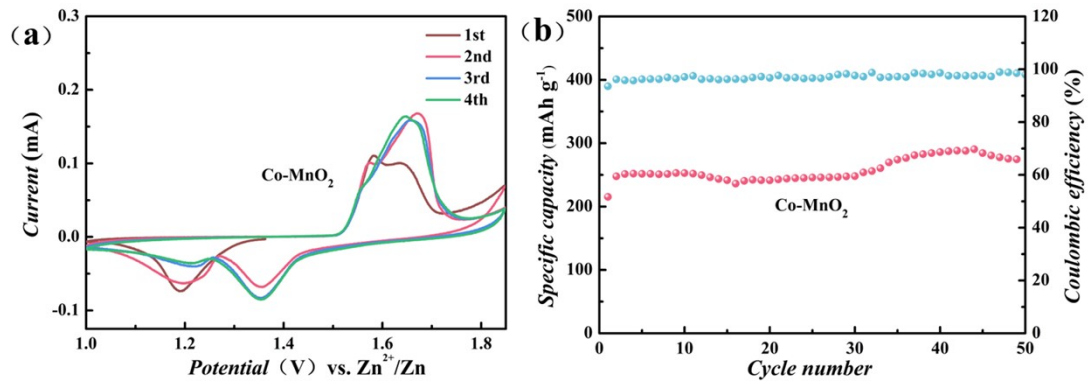

**Fig. S11.** CV of the Co-MnO<sub>2</sub> at the scan rate of 0.1 mV s<sup>-1</sup>; (b) Long-cycle performance of Co-MnO<sub>2</sub> at 0.2 A g<sup>-1</sup>.

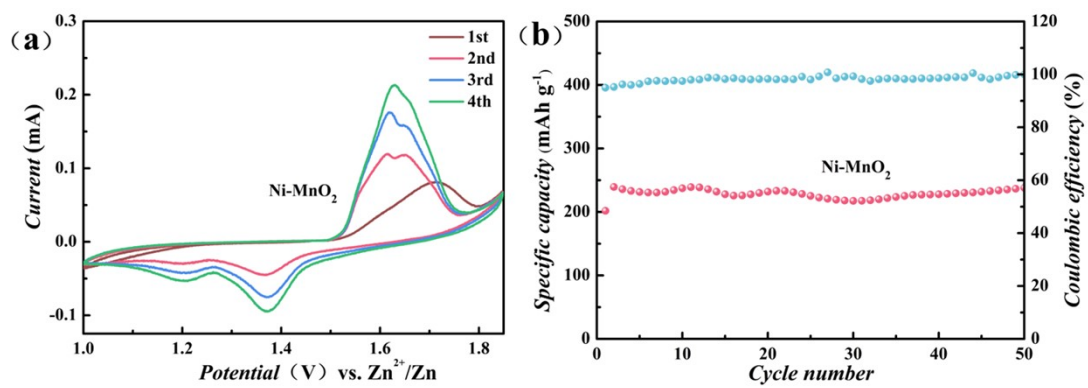

**Fig. S12.** CV of the Ni-MnO<sub>2</sub> at the scan rate of 0.1 mV s<sup>-1</sup>; (b) Long-cycle performance of Ni-MnO<sub>2</sub> at 0.2 A g<sup>-1</sup>.

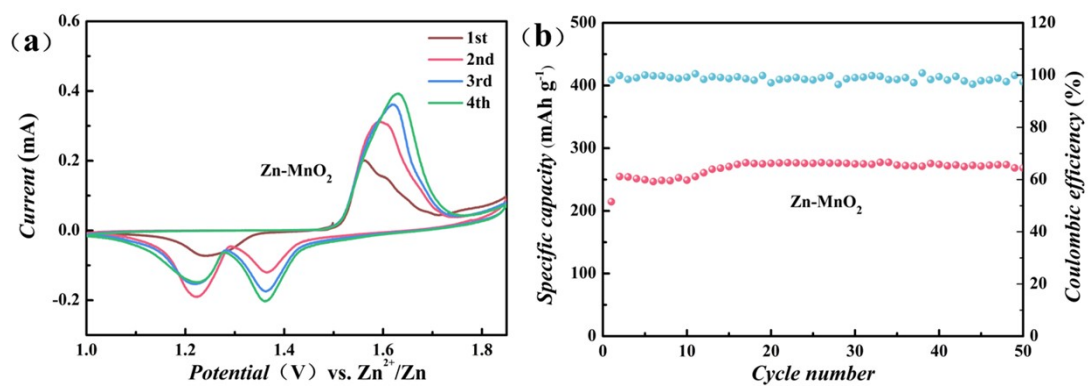

**Fig. S13.** CV of the Zn-MnO<sub>2</sub> at the scan rate of 0.1 mV s<sup>-1</sup>; (b) Long-cycle performance of Zn-MnO<sub>2</sub> at 0.2 A g<sup>-1</sup>.

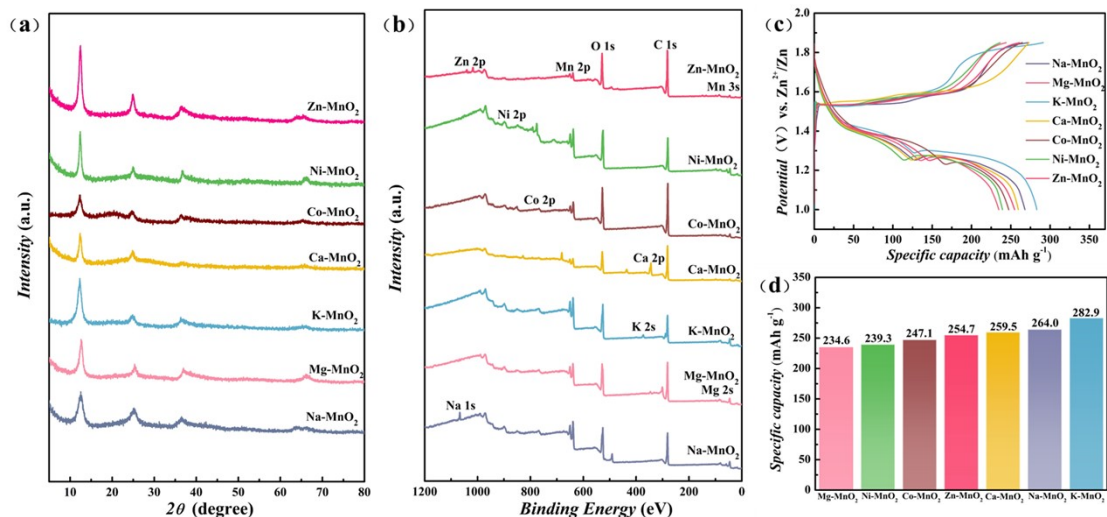

**Fig. S14.** (a) XRD patterns and (b) XPS survey spectra of the X-MnO<sub>2</sub> (X=Na, Mg, K, Ca, Co, Ni, Zn); (c) Charge and discharge curves of the X-MnO<sub>2</sub> (X=Na, Mg, K, Ca, Co, Ni, Zn) at 0.2 A g<sup>-1</sup>; (d) Comparison of specific capacity of the X-MnO<sub>2</sub> (X=Na, Mg, K, Ca, Co, Ni, Zn).

To delve deeper into the electrochemical performance of various cation pre-intercalated MnO<sub>2</sub> as cathode materials for ZIBs, X-MnO<sub>2</sub> (where X=Na, Mg, K, Ca, Co, Ni, Zn) is synthesized using an ion exchange method. ICP-AES is used to determine the atomic ratio of X:Mn (X=Na, Mg, K, Ca, Co, Ni, Zn), MnO<sub>2</sub> pre-intercalated with different cations are finally denoted as Na<sub>0.43</sub>MnO<sub>2</sub>, Mg<sub>0.16</sub>MnO<sub>2</sub>, K<sub>0.23</sub>MnO<sub>2</sub>, Ca<sub>0.29</sub>MnO<sub>2</sub>, Co<sub>0.26</sub>MnO<sub>2</sub>, Ni<sub>0.22</sub>MnO<sub>2</sub>, and Zn<sub>0.25</sub>MnO<sub>2</sub> (Table S1). Fig. 7a shows the XRD patterns of X-MnO<sub>2</sub>. The presence of (001) and (002) crystal planes corresponding to the layered structure indicates that the crystal structure of MnO<sub>2</sub> is stable during the ion-exchange process. In addition, compared with TMA-MnO<sub>2</sub>, the peak of (001) has a large shift to the right, indicating that in the high-concentration metal ion solution, TMA<sup>+</sup> is completely released, and the metal cations in the solution enter the interlayer, forming

X-MnO<sub>2</sub>. It is worth noting that the (001) peak direction of X-MnO<sub>2</sub> after different ion exchange is shifted to different degrees, which may be related to the ionic radius. The larger the ionic radius, the smaller the rightward shift. The XPS survey spectra (Fig. 7b) of the X-MnO<sub>2</sub> shows the existence of Mn, O and X (X = Na, Mg, K, Ca, Co, Ni, Zn), which indicates the successful preparation of X-MnO<sub>2</sub>. The SEM images in Fig. S6 display X-MnO<sub>2</sub> with a consistent nanosheet morphology across all samples, suggesting that TMA-MnO<sub>2</sub> underwent a re-self-assembly process subsequent to exfoliation in solution. To reveal the zinc ion storage capacity of X-MnO<sub>2</sub>, we compare charge and discharge curves (Fig. 7c) of different ion-intercalated MnO<sub>2</sub> at 0.2 A g<sup>-1</sup>. Consistent with other literature reports, X-MnO<sub>2</sub> exhibits a charge-discharge platform of H<sup>+</sup> and Zn<sup>2+</sup>, and its specific capacity is intuitively shown in Figure 7d. The specific capacities of Na-MnO<sub>2</sub>, Mg-MnO<sub>2</sub>, K-MnO<sub>2</sub>, Ca-MnO<sub>2</sub>, Co-MnO<sub>2</sub>, Ni-MnO<sub>2</sub> and Zn-MnO<sub>2</sub> are 264.0, 234.6, 282.9, 259.5, 247.1, 239.3 and 254.7 mA h g<sup>-1</sup>, respectively. Fig. S7, 8, 9, 10, 11, 12 and 13 present the CV curves at 0.1 mV s<sup>-1</sup> and the extended cycle performance at 0.2 A g<sup>-1</sup> for Na-MnO<sub>2</sub>, Mg-MnO<sub>2</sub>, K-MnO<sub>2</sub>, Ca-MnO<sub>2</sub>, Co-MnO<sub>2</sub>, Ni-MnO<sub>2</sub>, and Zn-MnO<sub>2</sub>, respectively. X-MnO<sub>2</sub> exhibits similar electrochemical behavior and have excellent cycling stability at 0.2 A g<sup>-1</sup>. It is noteworthy that the capacity and stability of MnO<sub>2</sub> with various metal ion pre-intercalation layers is contingent not only upon ionic radius but also upon the relative abundance of metal ions incorporated within the MnO<sub>2</sub> lattice. In summary, this approach offers a novel method for investigating the zinc ion storage capabilities of various ion pre-intercalated MnO<sub>2</sub>, enabling further exploration of diverse cation

effects on the charge storage mechanism in zinc ion batteries and expanding potential applications to other ion-based battery systems.

**Table S2.** Performance comparison of aqueous ZIBs with manganese oxide-based materials as cathodes.

| Cathode material                     | Electrolyte                                                   | Specific capacity                                      | Capacity retention                                          | Ref.         |
|--------------------------------------|---------------------------------------------------------------|--------------------------------------------------------|-------------------------------------------------------------|--------------|
| TMA-MnO <sub>2</sub>                 | 2 M ZnSO <sub>4</sub> + 0.2 M MnSO <sub>4</sub>               | 310.3 mA h g <sup>-1</sup> at<br>0.2 A g <sup>-1</sup> | 91% after 1000 cycles at<br>2 A g <sup>-1</sup>             | This<br>work |
| F-MO                                 | 2 M ZnSO <sub>4</sub> + 0.2 M MnSO <sub>4</sub>               | 288 mA h g <sup>-1</sup> at<br>0.1 A g <sup>-1</sup>   | 96% after 200 cycles at<br>0.2 A g <sup>-1</sup>            | 1            |
| MnO <sub>2</sub> @MXene              | 2 M ZnSO <sub>4</sub> + 0.2 M MnSO <sub>4</sub>               | 184 mA h g <sup>-1</sup> at<br>0.05 A g <sup>-1</sup>  | 84.5% after 1000 cycles<br>at 0.1 A g <sup>-1</sup>         | 2            |
| HCM                                  | 2 M ZnSO <sub>4</sub> + 0.3 M MnSO <sub>4</sub>               | 341 mA h g <sup>-1</sup> at<br>0.2 A g <sup>-1</sup>   | 87% after 3500 cycles at<br>2 A g <sup>-1</sup>             | 3            |
| ε- MnO <sub>2</sub> @N               | 2 M ZnSO <sub>4</sub> + 0.5 M MnSO <sub>4</sub>               | 183.4 mA h g <sup>-1</sup> at<br>0.5 A g <sup>-1</sup> | 83% after 1000 cycles at<br>5 A g <sup>-1</sup>             | 4            |
| δ- MnO <sub>2</sub>                  | 1 M ZnSO <sub>4</sub>                                         | 252 mA h g <sup>-1</sup> at<br>0.083 A g <sup>-1</sup> | 43% after 100 cycles at<br>0.083 A g <sup>-1</sup>          | 5            |
| Mn <sub>3</sub> O <sub>4</sub> /CP   | 2 M ZnSO <sub>4</sub> + 0.2 M MnSO <sub>4</sub>               | 201 mA h g <sup>-1</sup> at<br>0.3 A g <sup>-1</sup>   | No decreasing after 200<br>cycles at 1 A g <sup>-1</sup>    | 6            |
| ZnMn <sub>2</sub> O <sub>4</sub> /NG | 1 M ZnSO <sub>4</sub> + 0.05 M MnSO <sub>4</sub>              | 232 mA h g <sup>-1</sup> at<br>0.1 A g <sup>-1</sup>   | 97.4% after 2500 cycles<br>at 1 A g <sup>-1</sup>           | 7            |
| Ocu-Mn <sub>2</sub> O <sub>3</sub>   | 3 M ZnSO <sub>4</sub> + 0.1 M MnSO <sub>4</sub>               | 241 mA h g <sup>-1</sup> at<br>0.1 A g <sup>-1</sup>   | 88% after 600 cycles at<br>1 A g <sup>-1</sup>              | 8            |
| δ-NMOH                               | 2 M ZnSO <sub>4</sub> + 0.2 M MnSO <sub>4</sub>               | 232 mA h g <sup>-1</sup> at<br>2 C                     | Nearly 100% after 2000<br>cycles at 10 C                    | 9            |
| ZMO/CNTs                             | 1 M ZnSO <sub>4</sub> + 0.1 M MnSO <sub>4</sub>               | 220.3 mA h g <sup>-1</sup> at<br>0.1 A g <sup>-1</sup> | 97.0% after 2000 cycles<br>at 3 A g <sup>-1</sup>           | 10           |
| Mn <sub>3</sub> O <sub>4</sub> @HCFs | 2 M ZnSO <sub>4</sub> + 0.15 M MnSO <sub>4</sub>              | 215.8 mA h g <sup>-1</sup> at<br>0.3 A g <sup>-1</sup> | No decreasing after<br>1300 cycles at 0.4 A g <sup>-1</sup> | 11           |
| Fe/α-MnO <sub>2</sub> @PPy           | 2 M ZnSO <sub>4</sub> + 0.1 M MnSO <sub>4</sub>               | 270 mA h g <sup>-1</sup> at<br>0.1 A g <sup>-1</sup>   | 71.4.% after 100 cycles<br>at 0.1 A g <sup>-1</sup>         | 12           |
| α-MnO <sub>2</sub> /CNT              | 2 M ZnSO <sub>4</sub> + 0.1 M MnSO <sub>4</sub>               | 296 mA h g <sup>-1</sup> at<br>0.2 A g <sup>-1</sup>   | No decreasing after 100<br>cycles at 0.2 A g <sup>-1</sup>  | 13           |
| HMs                                  |                                                               |                                                        |                                                             |              |
| Ti-MnO <sub>2</sub>                  | 3 M Zn(CF <sub>3</sub> SO <sub>3</sub> ) <sub>2</sub> + 0.1 M | 259 mA h g <sup>-1</sup> at                            | 80% after 4000 cycles at                                    | 14           |



---

**References**

1. D. Wang, Z. Liu, X.-W. Gao, Q. Gu, L. Zhao and W.-B. Luo, *Journal of Energy Storage*, 2023, **72**, 108740.
2. L. Wu, Y. Mei, Y. Liu, W. Xu, M. Zhang, Y. Dong and Z.-S. Wu, *Chemical Engineering Journal*, 2023, **459**, 141662.
3. S. Luo, J. Xu, B. Yuan, L. Chen, L. Xu, R. Zheng, Y. Wang, M. Zhang, Y. Lu and Y. Luo, *Carbon*, 2023, **214**, 118334.
4. Y. Zhang, Y. Liu, Z. Liu, X. Wu, Y. Wen, H. Chen, X. Ni, G. Liu, J. Huang and S. Peng, *Journal of Energy Chemistry*, 2022, **64**, 23-32.
5. M. H. Alfaruqi, J. Gim, S. Kim, J. Song, D. T. Pham, J. Jo, Z. Xiu, V. Mathew and J. Kim, *Electrochemistry Communications*, 2015, **60**, 121-125.
6. A. Dhiman and D. G. Ivey, *Batteries & Supercaps*, 2020, **3**, 293-305.
7. L. Chen, Z. Yang, H. Qin, X. Zeng and J. Meng, *Journal of power sources*, 2019, **425**, 162-169.
8. N. Liu, X. Wu, Y. Yin, A. Chen, C. Zhao, Z. Guo, L. Fan and N. Zhang, *ACS applied materials & interfaces*, 2020, **12**, 28199-28205.
9. D. Wang, L. Wang, G. Liang, H. Li, Z. Liu, Z. Tang, J. Liang and C. Zhi, *ACS nano*, 2019, **13**, 10643-10652.
10. F. Gao, B. Mei, X. Xu, J. Ren, D. Zhao, Z. Zhang, Z. Wang, Y. Wu, X. Liu and Y. Zhang, *Chemical Engineering Journal*, 2022, **448**, 137742.
11. J. Long, Z. Yang, F. Yang, J. Cuan and J. Wu, *Electrochimica Acta*, 2020, **344**,

136155.

12. J.-W. Xu, Q.-L. Gao, Y.-M. Xia, X.-S. Lin, W.-L. Liu, M.-M. Ren, F.-G. Kong, S.-J. Wang and C. Lin, *Journal of Colloid and Interface Science*, 2021, **598**, 419-429.
13. Y. Liu, X. Chi, Q. Han, Y. Du, J. Huang, Y. Liu and J. Yang, *Journal of Power Sources*, 2019, **443**, 227244.
14. S. Lian, C. Sun, W. Xu, W. Huo, Y. Luo, K. Zhao, G. Yao, W. Xu, Y. Zhang and Z. Li, *Nano Energy*, 2019, **62**, 79-84.
